# Supplementary material for: A continuous-flow acoustofluidic cytometer for single-cell mechanotyping
Source: Royal Society of Chemistry journal article supplement (doi:10.1039/c8lc00711j), 2019-01-01
Supplement: c8lc00711j1.pdf [file c8lc00711j1.pdf]

## Electronic Supplementary Information

### A continuous-flow acoustofluidic cytometer for single-cell mechanotyping

**Han Wang,<sup>a</sup> Zhongzheng Liu,<sup>b</sup> Dong M. Shin,<sup>c</sup> Zhuo G. Chen,<sup>c</sup> Younghak Cho,<sup>d</sup> Yong-Joe Kim,<sup>b</sup> and A. Han<sup>\*e,f,g</sup>**

<sup>a</sup> Department of Biomedical Engineering, School of Medicine, Tsinghua University, Beijing, 100084, China.

<sup>b</sup> Department of Mechanical Engineering, Texas A&M University, College Station, TX, 77843, USA.

<sup>c</sup> Department of Hematology and Medical Oncology, Emory University School of Medicine, Atlanta, GA, USA.

<sup>d</sup> Department of Mechanical System Design Engineering, Seoul National University of Science and Technology, Seoul, Republic of Korea.

<sup>e</sup> Department of Electrical and Computer Engineering, Texas A&M University, College Station, TX, 77843, USA.

<sup>f</sup> Department of Biomedical Engineering, Texas A&M University, College Station, TX, 77843, USA.

<sup>g</sup> Center for Remote Healthcare Technology and Systems (CRHTS), Texas A&M University, College Station, TX, 77843, USA.

\*Correspondence should be addressed to Arum Han (arum.han@ece.tamu.edu).

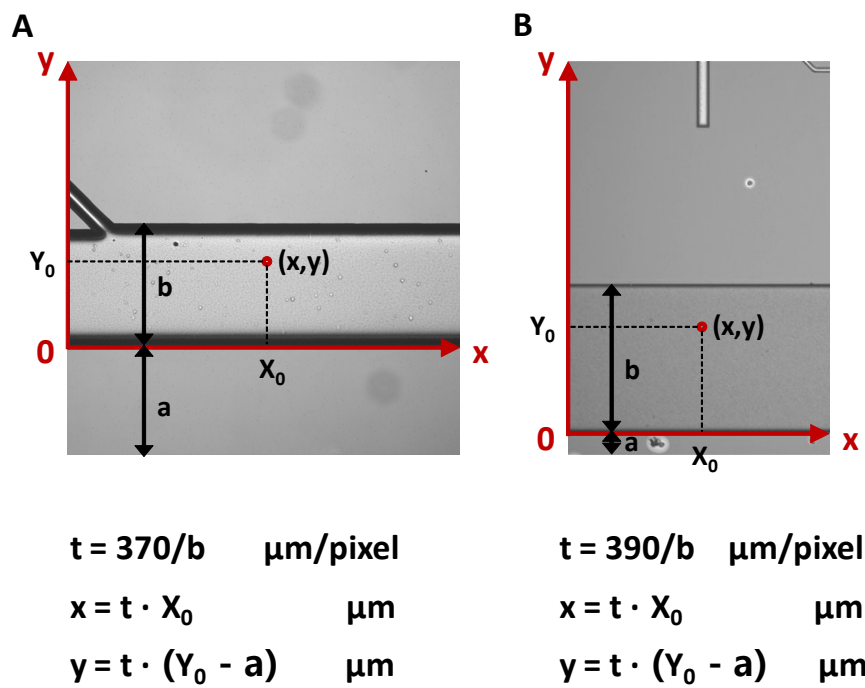

**Fig. S1** The coordinate conversion method for processing the raw image data for (A) Set 1 microdevices and (B) Set 2 microdevices.
